# Supplementary material
Source: PubMed Central journal article supplement (PMC5526459)
Supplement: NIHMS875320-supplement-Supp_info.pdf [file NIHMS875320-supplement-Supp_info.pdf]

**Table S1. Mutations in breast cancer genes in Palestinian patients**

| Subject | Age breast cancer diagnosis | Gene  | Position (hg 19)            | cDNA change     | Molecular consequence | ExAC allele count | Reported here for first time | Study cohort (M/G) | Selection criteria | FH breast cancer | FH ovarian cancer | FH male breast cancer |
|---------|-----------------------------|-------|-----------------------------|-----------------|-----------------------|-------------------|------------------------------|--------------------|--------------------|------------------|-------------------|-----------------------|
| MK1ES   | 41                          | BRCA1 | chr17:41,268,824-41,297,565 | del exons 1-3   | del 28.7 kb           | 0                 | Y                            | M                  | FH                 | Y                |                   |                       |
| MKAH    | 54                          | BRCA1 | chr17:41,267,756            | c.121 C>T       | p.His41Tyr            | 0                 | Y                            | M                  | FH                 | Y                | Y                 |                       |
| MK1     | Bi 34, 37                   | BRCA1 | chr17:41,267,746            | c.131 G>T       | p.Cys44Phe            | 0                 |                              | M                  | FH                 | Y                | Y                 |                       |
| MKUP    | 35                          | BRCA1 | chr17:41,258,532            | c.315insGG      | p.Leu52GlyfsX18       | 0                 | Y                            | M                  | FH                 | Y                |                   |                       |
| MKCX    | 42                          | BRCA1 | chr17:41,247,926            | c.607 G>T       | p.Glu203Ter           | 0                 | Y                            | M                  | FH                 | Y                |                   |                       |
| MK2     | Bi 51, 58                   | BRCA1 | chr17:41,246,326            | c.1224delA      | p.Val409Ter           | 0                 |                              | M                  | FH                 | Y                |                   |                       |
| MKWW    | 27                          | BRCA1 | chr17:41,246,326            | c.1224delA      | p.Val409Ter           | 0                 |                              | M                  | FH                 | Y                |                   |                       |
| MKPY    | 48                          | BRCA1 | chr17:41,245,394            | c.2291insA      | p.Glu720ArgfsX6       | 0                 |                              | M                  | FH                 | Y                | Y                 |                       |
| MKSR    | 27                          | BRCA1 | chr17:41,243,029            | c.4117 C>A      | p.Glu1373Ter          | 0                 |                              | M                  | FH                 | Y                |                   |                       |
| MKKB    | 33                          | BRCA1 | chr17:41,219,622            | c.5074(+3) A>G  | (see note*)           | 0                 |                              | M                  | FH                 | Y                |                   |                       |
| MKTC    | 36                          | BRCA1 | chr17:41,199,683            | c.5444 C>T      | p.Trp1815Ter          | 1                 |                              | M                  | age                |                  |                   |                       |
| MKK     | 33                          | BRCA2 | chr13:32,903,605            | c.658 del GT    | p.Val220IlefsX4       | 6                 |                              | M                  | age                |                  |                   |                       |
| MK1EQ   | 32                          | BRCA2 | chr13:32,907,420            | c.1806 ins A    | p.Gly602fsX13         | 0                 |                              | M                  | FH                 | Y                |                   |                       |
| MKG     | 32                          | BRCA2 | chr13:32,910,746            | c.2482 del GACT | p.Asp752PhefsX19      | 0                 |                              | M                  | FH                 | Y                |                   |                       |
| MKDC    | 31                          | BRCA2 | chr13:32,910,746            | c.2482 del GACT | p.Asp752PhefsX19      | 0                 |                              | M                  | age                |                  |                   |                       |
| MKIP    | 40                          | BRCA2 | chr13:32,910,746            | c.2482 del GACT | p.Asp752PhefsX19      | 0                 |                              | M                  | FH                 | Y                |                   |                       |
| MKQV    | 45                          | BRCA2 | chr13:32,910,746            | c.2482 del GACT | p.Asp752PhefsX19      | 0                 |                              | M                  | FH                 | Y                |                   |                       |
| MK1EB   | 66                          | BRCA2 | chr13:32,910,746            | c.2482 del GACT | p.Asp752PhefsX19      | 0                 |                              | G                  | -                  |                  |                   |                       |

|       |            |       |                                   |                 |                   |    |   |   |     |   |   |
|-------|------------|-------|-----------------------------------|-----------------|-------------------|----|---|---|-----|---|---|
| MK1CC | 48         | BRCA2 | chr13:32,910,746                  | c.2482 del GACT | p.Asp752PhefsX19  | 0  |   | M | FH  | Y |   |
| MKDE  | 36         | BRCA2 | chr13:32,911,298                  | c.3033 del AAAC | p.Ala938ProfsX21  | 2  |   | M | age |   |   |
| MKZE  | 61         | BRCA2 | chr13:32,911,837                  | c.3345 del T    | p.Thr1116LeufsX3  | 0  | Y | M | FH  | Y | Y |
| MKVI  | 35         | BRCA2 | chr13:32,912,110                  | c.3617 del TTAT | p.Tyr1207Ter      | 0  | Y | M | age |   |   |
| MKTV  | 40         | BRCA2 | chr13:32,912,338                  | c.3846delTG     | p.Val1283LysfsX2  | 11 |   | M | FH  |   | Y |
| MKZT  | 42         | BRCA2 | chr13:32,912,338                  | c.3846delTG     | p.Val1283LysfsX2  | 11 |   | G | -   |   |   |
| MK1CW | Ov38, Br47 | BRCA2 | chr13:32,912,338                  | c.3846delTG     | p.Val1283LysfsX2  | 11 |   | M | FH  | Y |   |
| MKTO  | 44         | BRCA2 | chr13:32,913,559                  | c.5073 ins A    | p.Trp1692MetfsX3  | 1  |   | M | FH  | Y |   |
| MKDO  | 39         | BRCA2 | chr13:32,914,954                  | c.6462 del TC   | p.Gln2157IlefsX18 | 0  |   | M | FH  | Y |   |
| MKUQ  | 29         | BRCA2 | chr13:32,914,954                  | c.6462 del TC   | p.Gln2157IlefsX18 | 0  |   | M | FH  | Y |   |
| MKEV  | 58         | BRCA2 | chr13:32,915,177                  | c.6685 G>T      | p.Glu2229Ter      | 0  |   | M | FH  | Y |   |
| MKQS  | 40         | BRCA2 | chr13:32,915,177                  | c.6685 G>T      | p.Glu2229Ter      | 0  |   | M | FH  | Y |   |
| MKFK  | 47         | BRCA2 | chr13:32,915,177                  | c.6685 G>T      | p.Glu2229Ter      | 0  |   | M | FH  | Y |   |
| MKCI  | 50         | BRCA2 | chr13:32,915,177                  | c.6685 G>T      | p.Glu2229Ter      | 0  |   | G | -   |   |   |
| MK1DA | 26         | BRCA2 | chr13:32,950,929                  | c.8754(+1)G>A   | splice            |    |   | M | FH  |   |   |
| MKVL  | 48         | BRCA2 | chr13:32,968,951                  | c.9382C>T       | p.Arg3128Ter      | 2  |   | M | FH  | Y |   |
| MK3   | 35         | ATM   | chr11:108,128,239                 | c.2284delCT     | p.Leu762ValfsX2   | 0  |   | M | FH  | Y |   |
| MK1C  | 41         | ATM   | chr11:108,139,336                 | c.2838 G>T      | splice            |    |   | M | FH  |   | Y |
| MK1O  | 60         | ATM   | chr11:108,202,695                 | c.7720insA      | p.Pro2575ThrfsX11 | 0  | Y | M | FH  | Y |   |
| MKBH  | 39         | ATM   | chr11:108,206,605                 | c.8185 C>T      | p.Gln2729Ter      | 1  |   | M | age |   |   |
| MKPB  | 54         | ATM   | chr11:108,206,605                 | c.8185 C>T      | p.Gln2729Ter      | 1  |   | G | -   |   |   |
| MK4   | 39         | ATM   | chr11:108,096,223<br>-108,099,134 | del exons 1-2   | del 2.9kb         | 0  | Y | M | FH  | Y |   |
| MK1DC | 36         | ATM   | chr11:108,096,223<br>-108,099,134 | del exons 1-2   | del 2.9kb         | 0  | Y | M | age |   |   |
| MK5   | 36         | CHEK2 | chr22:29,121,058                  | c.499 G>A       | p.Gly167Arg       | 5  |   | M | FH  |   | Y |
| MKUB  | 43         | CHEK2 | chr22:29,121,058                  | c.499 G>A       | p.Gly167Arg**     | 5  |   | M | FH  | Y | Y |
| MKI   | 42         | CHEK2 | chr22:29,095,917                  | c.917 G>C       | p.Gly306Ala       | 7  |   | M | FH  | Y |   |
| MKIA  | 60         | CHEK2 | chr22:29,095,917                  | c.917 G>C       | p.Gly306Ala       | 7  |   | M | FH  | Y |   |
| MKZD  | 20         | CHEK2 | chr22:29,120,962                  | c.592(+3)T>A    | (see note***)     | 4  |   | M | FH  | Y |   |

|       |    |        |                  |              |                 |   |   |     |     |   |   |
|-------|----|--------|------------------|--------------|-----------------|---|---|-----|-----|---|---|
| MK7   | 32 | TP53   | chr17:7,578,389  | c.541 G>A    | p.Arg181Cys     | 0 | M | FH  | Y   |   |   |
| MK8   | 36 | TP53   | chr17:7,578,389  | c.541 G>A    | p.Arg181Cys     | 0 | M | FH  | Y   |   |   |
| MK1FJ | 68 | TP53   | chr17:7,578,389  | c.541 G>A    | p.Arg181Cys     | 0 | M | FH  | Y   |   |   |
| MKYE  | 56 | TP53   | chr17:7,578,389  | c.541 G>A    | p.Arg181Cys     | 0 | M | FH  | Y   |   |   |
| MK1GG | 45 | TP53   | chr17:7,578,389  | c.541 G>A    | p.Arg181Cys     | 0 | M | FH  | Y   |   |   |
| MKWE  | 39 | TP53   | chr17:7,578,389  | c.541 G>A    | p.Arg181Cys     | 0 | M | age |     |   |   |
| MK1FP | 27 | TP53   | chr17:7,578,389  | c.541 G>A    | p.Arg181Cys     | 0 | M | age |     |   |   |
| MK1CL | 60 | TP53   | chr17:7,578,389  | c.541 G>A    | p.Arg181Cys     | 0 | M | FH  | Y   |   |   |
| MKLR  | 41 | TP53   | chr17:7,578,389  | c.541 G>A    | p.Arg181Cys     | 0 | M | FH  | Y   |   |   |
| MKUB  | 43 | BARD1  | chr2:215,657,138 | c.247 A>G    | p.Cys83Arg**    | 0 | Y | M   | FH  | Y | Y |
| MKPX  | 34 | BARD1  | chr2:215,593,531 | c.2257 C>T   | p.Gln735Ter**** | 0 | Y | M   | FH  | Y |   |
| MKZO  | 32 | BARD1  | chr2:215,593,531 | c.2257 C>T   | p.Gln735Ter     | 0 | Y | M   | age |   |   |
| MK1EK | 29 | BARD1  | chr2:215,657,157 | c.225delACTT | p.Ser76ThrfsX19 | 0 | Y | M   | age |   |   |
| MKPJ  | 40 | BRIP1  | chr17:59,934,561 | c.237delA    | p.Ala80LeufsX21 | 0 | Y | M   | age |   |   |
| MKJ   | 30 | BRIP1  | chr17:59,878,628 | c.1126 C>T   | p.Gln376Ter     | 0 | Y | M   | age |   |   |
| MKHA  | 42 | MRE11A | chr11:94,180,454 | c.1714 C>T   | p.Arg572Ter     | 9 | M | FH  | Y   |   |   |
| MKTJ  | 40 | PALB2  | chr16:23,641,218 | c.2257 C>T   | p.Arg753Ter     | 4 | M | FH  | Y   |   |   |
| MK10  | 35 | XRCC2  | chr7:152,345,927 | c.643 C>T    | p.Arg215Ter     | 5 | M | age |     |   |   |

Mutations were identified in the mutation discovery cohort (M) by BROCA sequencing and in the general patient cohort (G) by genotyping all alleles found in the mutation discovery cohort. Selection criteria were family history (FH) or age at diagnosis age 40 or younger (age)

\* Mutation alters splicing leading to truncation via multiple transcripts (Menendez M et al. Breast Can Res 2012;132:979-992)

\*\* MKUB carries mutations in CHEK2 and BARD1

\*\*\* Kraus C et al. Int J Cancer 2017;140(1):95-102.

\*\*\*\* BARD1 Q735X also appeared in 2/100 Palestinian controls.

ExAC database at <http://exac.broadinstitute.org/> Accessed 17 December 2016

Bi (bilateral breast cancer), Ov (ovarian cancer), Br (breast cancer), Y (Yes)

**Table S2. Previously unreported variants of unknown significance in Palestinian breast cancer patients**

| Chr | Coordinate  | Gene    | cDNA                      | Protein | Transcript   | Type       | MaxEnt score<br>(ref > mut) | Gerp | Comment                                                         |
|-----|-------------|---------|---------------------------|---------|--------------|------------|-----------------------------|------|-----------------------------------------------------------------|
| 4   | 84,397,795  | FAM175A | c.215(+1)G>A<br>(exon3)   |         | NM_139076    | splice     | 9.66>1.48                   | 5.2  | bp completely conserved, exon<br>deletion would be out of frame |
| 11  | 108,213,947 | ATM     | c.8269(-2)A>C<br>(exon57) |         | NM_000051    | splice     | 6.65>-1.39                  | 5.6  | bp completely conserved, exon<br>deletion would be inframe      |
| 17  | 59,793,310  | BRIP1   | c.2492(+2)T>C<br>(exon17) |         | NM_032043    | splice     | 9.66>1.91                   | 5.6  | bp completely conserved, exon<br>deletion would be out of frame |
| 22  | 29,121,257  | CHEK2   | c.A547G<br>(exon4)        | S183G   | NM_001005735 | missense - | -                           | 5.9  | aa completely conserved, PPH2<br>= 1.0, FHA domain              |

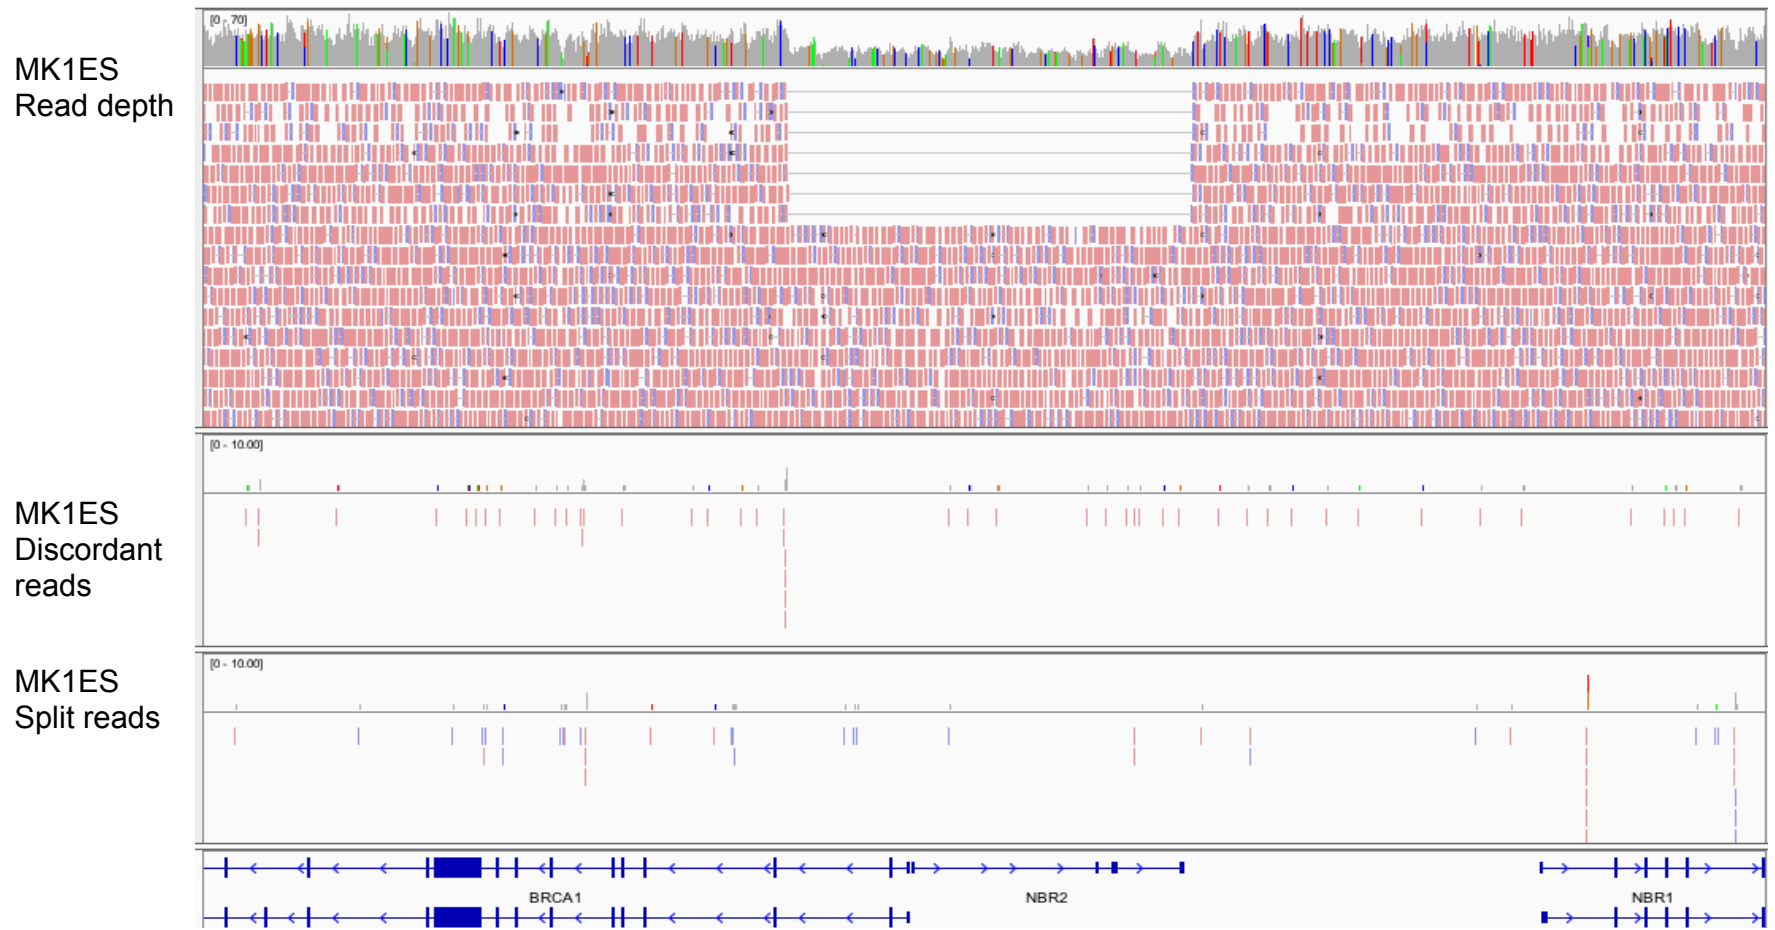

**Figure S1.** Deletion of the *BRCA1* promoter at chr17:41,268,824-41,297,565 in patient MK1ES, with breakpoints identified by whole genome sequencing and analysis by MANTA-SV

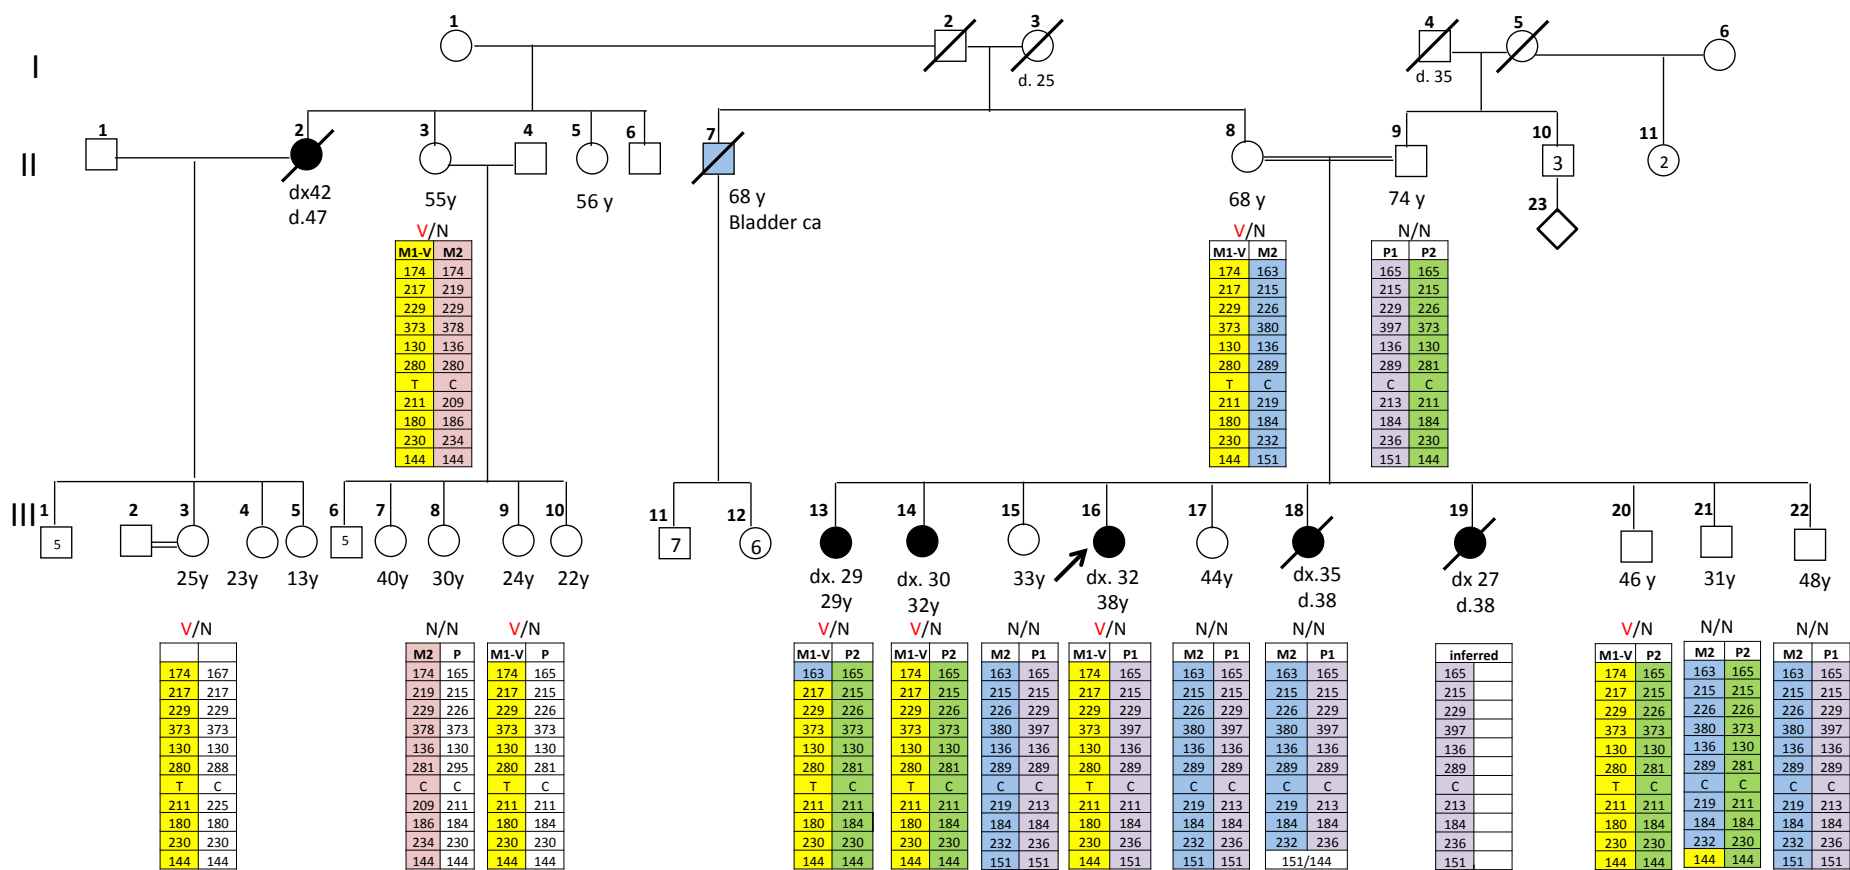

IV

**Figure S2** Haplotype analysis of family MK7 for markers on chromosome 17p flanking TP53 p.R181C. Markers are indicated in the table; numbers on each haplotype represent allele sizes. The haplotype of TP53 p.R181C is in yellow. III-18 does not carry TP53 p.R181C despite her young age at breast cancer diagnosis. DNA from III-19 was not available, and her children all inherited the haplotype of their maternal grandfather (II-9), so the TP53 genotype of III-19 cannot be inferred.

| TP53 region, chromosome 17p |                       |                         |
|-----------------------------|-----------------------|-------------------------|
| D17S---                     | Genomic position hg19 | Distance from gene (bp) |
| 796                         | 6,251,594             | -1,326,795              |
| 1881                        | 6,527,835             | -1,050,554              |
| 516                         | 6,653,622             | -924,767                |
| 578                         | 6,823,888             | -754,501                |
| 960                         | 7,257,773             | -320,616                |
| 157G                        | 7,431,324             | -147,065                |
| <b>c.541 C&gt;T</b>         | <b>7,578,389</b>      | <b>0</b>                |
| 1353                        | 7,617,423             | 39,034.0                |
| 1796                        | 7,787,271             | 208,882                 |
| 1812                        | 8,261,908             | 683,519                 |
| 786                         | 8,811,780             | 1,233,391               |

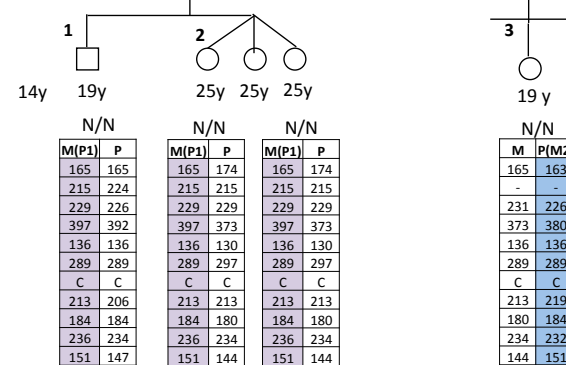

|                                                   |          |                 | Family         |                |                |                  |
|---------------------------------------------------|----------|-----------------|----------------|----------------|----------------|------------------|
|                                                   |          |                 | <b>MK7</b>     | <b>MK8</b>     | <b>MK1CL</b>   |                  |
| Marker order                                      | Marker   | Position (hg19) | Genotype       | Genotype       | Genotype       | Shared haplotype |
| 1                                                 | D17S796  | 6,251,594       | <b>174/165</b> | 165/165        | <b>174/169</b> | <b>174</b>       |
| 2                                                 | D17S1881 | 6,527,835       | <b>217/215</b> | 224/225        | <b>217/211</b> | <b>217</b>       |
| 3                                                 | D17S516  | 6,653,622       | <b>229/229</b> | 227/240        | <b>229/229</b> | <b>229</b>       |
| 4                                                 | D17S578  | 6,823,888       | <b>373/379</b> | <b>373/373</b> | <b>373/373</b> | <b>373</b>       |
| 5                                                 | D17S960  | 7,257,773       | <b>130/136</b> | <b>130/136</b> | <b>130/136</b> | <b>130</b>       |
| 6                                                 | 15TG     | 7,431,324       | <b>280/289</b> | <b>280/289</b> | <b>280/297</b> | <b>280</b>       |
| TP53 at 7,571,720 – 7,590,868; R181C at 7,578,389 |          |                 |                |                |                |                  |
| 7                                                 | D17S1353 | 7,617,423       | <b>211/211</b> | <b>211/211</b> | <b>211/219</b> | <b>211</b>       |
| 8                                                 | D17S1796 | 7,787,271       | <b>180/184</b> | <b>180/184</b> | <b>180/184</b> | <b>180</b>       |
| 9                                                 | D17S1812 | 8,261,908       | <b>230/236</b> | <b>230/234</b> | <b>230/236</b> | <b>230</b>       |
| 10                                                | D17S786  | 8,811,780       | <b>144/151</b> | <b>144/144</b> | <b>144/144</b> | <b>144</b>       |

**Figure S3.** Genotypes at chromosome 17p markers of patients heterozygous for TP53 p.R181C. For each STR marker, allele sizes are indicated in basepairs. The shared haplotype is shown in the blue shaded column.
